# Supplementary material
Source: publisher site journal article supplement (https://www.dovepress.com/get_supplementary_file.php?f=393454.docx)
Supplement: Supplementary file 1 [file get_supplementary_file.php]

# Supplementary Information

# Polydopamine Nanoparticles-Based Photothermal Effect against Adhesion Formation in a Rat Model of Achilles Tendon Laceration Repair

Zekun Zhou1,2, Shaoyan Li1,2, Xu Gong1,2

1Department of Hand and Podiatric Surgery, Orthopedics Center, The First Hospital of Jilin University, Changchun, 130021, People’s Republic of China

2Jilin Province Key Laboratory on Tissue Repair, Reconstruction and Regeneration, The First Hospital of Jilin University, Changchun, 130021, People’s Republic of China

Correspondence: Professor Xu Gong

Department of Hand and Podiatric Surgery, Orthopedics Center

The First Hospital of Jilin University

1 Xin Min Street, Changchun, Jilin Province

130021

People’s Republic of China

Tel: +86 13944099151

Email：gongxu@jlu.edu.cn


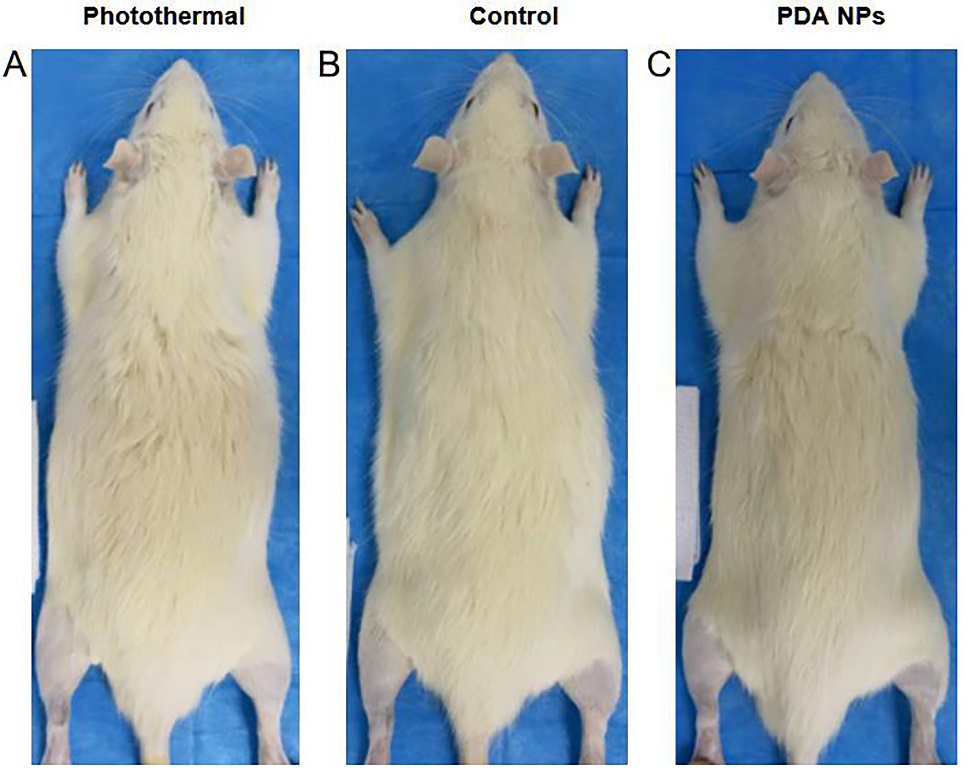


Supplementary Information Figure 1: The skin healed well without infection and ulceration. (A) The gross observation of the photothermal group. (B) The gross observation of the control group. (C) The gross observation of the PDA NPs group.


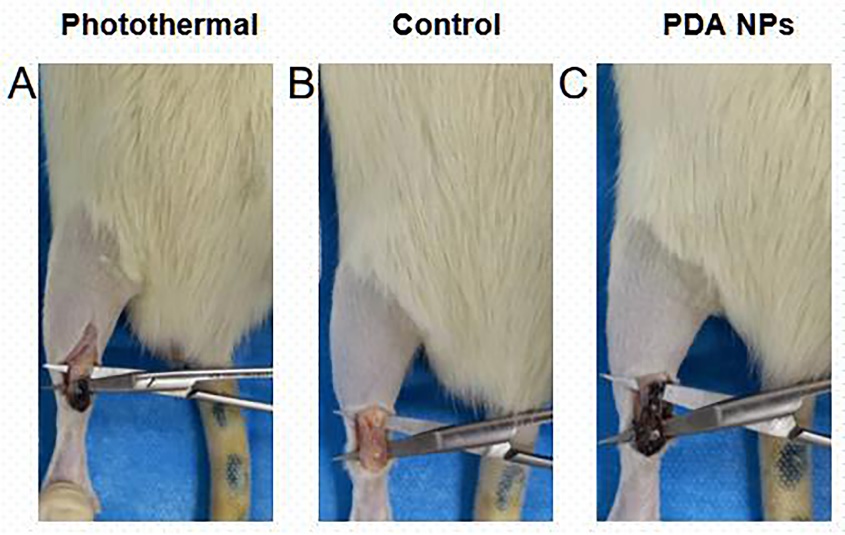


Supplementary Information Figure 2: (A, B, C) At two weeks after surgery, the tendon healed completely. (A) The healed tendon of the photothermal group. (B) The healed tendon of the control group. (C) The healed tendon of the PDA NPs group.
